# Supplementary material for: Diagnostic accuracy of photodynamic diagnosis with 5-aminolevulinic acid, hexaminolevulinate and narrow band imaging for non-muscle invasive bladder cancer
Source: PubMed Central journal article supplement (PMC6959070; doi:10.7150/jca.34527), 2020-01-01
Supplement: jcav11p1082s1.pdf [file jcav11p1082s1.pdf]

# Supplementary figures

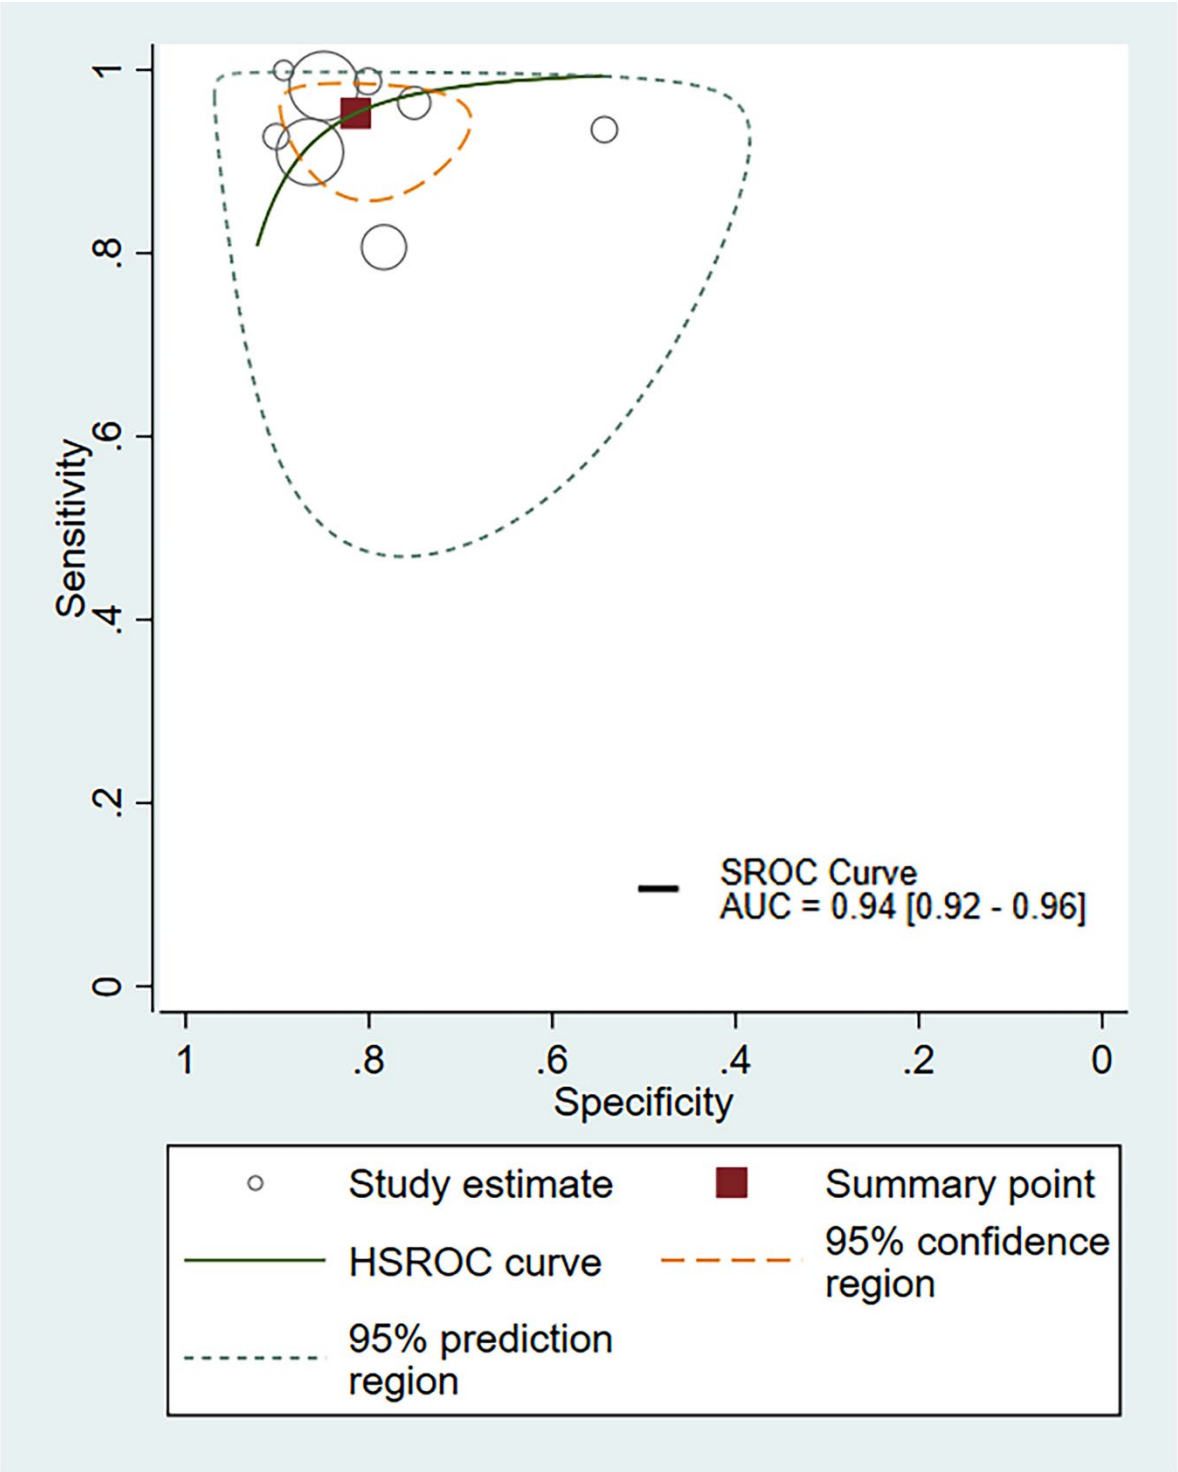

**Supplementary figure 1.** The HSROC curve for HAL diagnosing NMIBC comparing with WLC in lesion level.

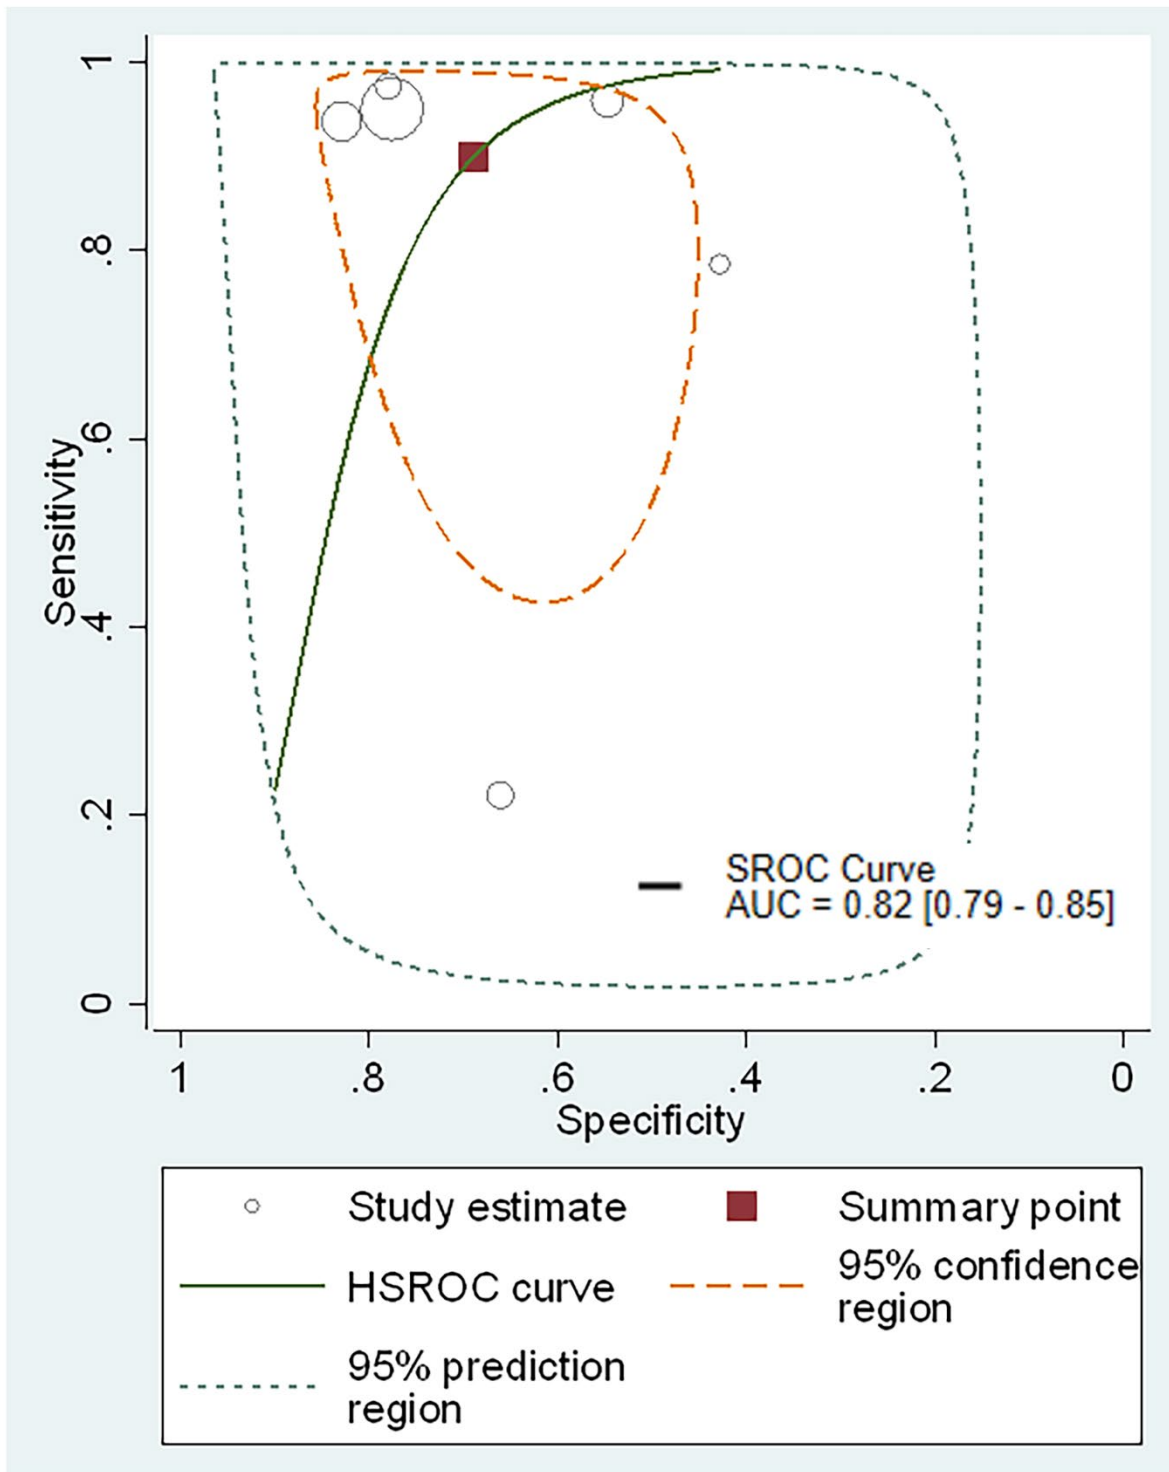

**Supplementary figure 2.** The HSROC curve for 5-ALA diagnosing NMIBC comparing with WLC in lesion level.

## Supplementary tables

**Supplementary Table 1: Sensitivity analysis of DTA for NBI (6 studies) with low to moderate RoB.**

|                | <b>Sensitivity</b> | <b>Specificity</b> | <b>PPV</b>         | <b>NPV</b>       | <b>FP</b>          | <b>FN</b>         |
|----------------|--------------------|--------------------|--------------------|------------------|--------------------|-------------------|
| <b>Median</b>  | 95.85%             | 74.99%             | 79.84%             | 99.33%           | 25.01%             | 4.15%             |
| <b>(IQR)</b>   | (88.80-<br>99.60%) | (71.66-<br>80.98%) | (75.87-<br>82.02%) | (97.90-<br>100%) | (19.02-<br>28.34%) | (0.40-<br>11.20%) |
| <b>Minimum</b> | 86.25%             | 69.17%             | 53.92%             | 92.16%           | 4.26%              | 0%                |
| <b>Maximum</b> | 100%               | 95.74%             | 90.48%             | 100%             | 30.83%             | 13.75%            |

**Supplementary Table 2: Sensitivity analysis of DTA for HAL (6 studies) with low to moderate RoB.**

|                | <b>Sensitivity</b> | <b>Specificity</b> | <b>PPV</b>         | <b>NPV</b>         | <b>FP</b>          | <b>FN</b>        |
|----------------|--------------------|--------------------|--------------------|--------------------|--------------------|------------------|
| <b>Median</b>  | 95.00%             | 83.33%             | 71.65%             | 99.17%             | 16.67%             | 5.00%            |
| <b>(IQR)</b>   | (92.97-<br>98.21%) | (76.38-<br>88.65%) | (67.94-<br>76.16%) | (94.20-<br>99.89%) | (11.35-<br>23.62%) | (1.79-<br>7.03%) |
| <b>Minimum</b> | 91.11%             | 54.37%             | 64.93%             | 88.73%             | 9.82%              | 0%               |
| <b>Maximum</b> | 100%               | 90.18%             | 87.5%              | 100%               | 45.63%             | 8.89%            |

**Supplementary Table 3: Sensitivity analysis of DTA for 5-ALA (4 studies) with low to moderate RoB.**

|                | <b>Sensitivity</b> | <b>Specificity</b> | <b>PPV</b>         | <b>NPV</b>       | <b>FP</b>          | <b>FN</b>        |
|----------------|--------------------|--------------------|--------------------|------------------|--------------------|------------------|
| <b>Median</b>  | 95.51%             | 77.82%             | 66.19%             | 100%             | 22.18%             | 4.49%            |
| <b>(IQR)</b>   | (94.75-<br>96.33%) | (71.90-<br>79.26%) | (63.44-<br>66.31%) | (99.12-<br>100%) | (20.74-<br>28.10%) | (3.67-<br>5.25%) |
| <b>Minimum</b> | 93.75%             | 54.76%             | 55.47%             | 96.50%           | 17.04%             | 2.50%            |
| <b>Maximum</b> | 97.50%             | 82.96%             | 66.37%             | 100%             | 45.24%             | 6.25%            |
